# Supplementary material for: IGF-1 Attenuates Hypoxia-Induced Atrophy but Inhibits Myoglobin Expression in C2C12 Skeletal Muscle Myotubes
Source: Int J Mol Sci. 2017 Sep 1;18(9):1889. doi: 10.3390/ijms18091889 (PMC5618538; doi:10.3390/ijms18091889)
Supplement: Supplementary file 1 [file ijms-18-01889-s001.xlsx]

## Sheet: Experiments hypoxia,IGF-1,lipid
Sample	Treatment	# experiment	Oxygen	IGF	Lipid	Conc. RNA (ng/ul)	260/280	260/230	Diameter	Mb absorption	Diameter in Mb photo	18S	Actin			Myoglobin			SDH			PGC-1a			Murf1			GAPDH			MyoD			Myogenin			Mafbx			VEGF			MHC I			MHC IIb
												Ct	Ct	ΔCt	2^-ΔCt	Ct	ΔCt	2^-ΔCt	Ct	ΔCt	2^-ΔCt	Ct	ΔCt	2^-ΔCt	Ct	ΔCt	2^-ΔCt	Ct	ΔCt	2^-ΔCt	Ct	ΔCt	2^-ΔCt	Ct	ΔCt	2^-ΔCt	Ct	ΔCt	2^-ΔCt	Ct	ΔCt	2^-ΔCt	Ct	ΔCt	2^-ΔCt	Ct	ΔCt	2^-ΔCt
A1	2% O2 Control	1	0.02			50.5	2	2.02	11.956	0.09285	13.7121	15.8528	13.8066	-2.04621	4.13021	16.3545	0.50174	0.706254	21.9938	6.14097	0.0141704	26.5748	10.722	0.000592034	24.7339	8.88112	0.00212089	15.3979	-0.454893	1.37068	23.1162	7.26344	0.0065086	19.4921	3.63927	0.0802547	20.9844	5.13159	0.0285258	19.7201	3.86725	0.068524	19.9503	4.09745	0.0584177	22.0936	6.24077	0.0132233
A2	2% O2 IGF	1	0.02	+		35.1	1.91	0.38	10.1544	0.09067	11.2845	16.0055	13.9639	-2.04154	4.11685	17.1417	1.13622	0.45495	21.8812	5.87574	0.0170304	28.7308	12.7253	0.00014767	26.8199	10.8144	0.00055532	15.3716	-0.633837	1.55169	24.2011	8.1956	0.00341097	19.9802	3.97474	0.0636041	23.3536	7.34813	0.00613752	19.9687	3.96321	0.0641142	20.9228	4.91731	0.0330934	21.3307	5.32521	0.0249432
A3	2% O2 Mix	1	0.02		+	48.7	2.01	2.02	15.6592	0.11509	15.0203	15.8414	13.4623	-2.37903	5.20189	15.6922	-0.1492	1.10895	21.2313	5.38992	0.0238492	26.1436	10.3023	0.000791959	24.4353	8.5939	0.00258808	14.8719	-0.969478	1.95813	22.8348	6.99341	0.00784826	18.9668	3.12543	0.114591	20.1585	4.31718	0.0501647	19.7387	3.89732	0.0671102	21.3262	5.48482	0.0223308	22.7145	6.87312	0.0085307
A4	2% Mix + IGF	1	0.02	+	+	23.4	1.97	1.08	13.6502	0.10328	11.5625	14.3097	14.2318	-0.0779149	1.05549	17.7317	3.42204	0.0932961	22.1469	7.83723	0.00437279	29.1247	14.8151	3.46913e-05	27.3362	13.0265	0.000119848	15.5457	1.23598	0.424555	25.2184	10.9087	0.000520175	20.4177	6.10799	0.0144981	24.1516	9.84187	0.00108969	20.7391	6.42944	0.0116024	23.4018	9.09213	0.0018323	22.2471	7.93747	0.00407929
B1	5% O2 Control	1	0.05			82.3	1.96	1.2	14.8303	0.09896	16.5657	16.5749	14.6408	-1.93408	3.82134	16.4737	-0.101158	1.07263	22.2013	5.62641	0.0202434	27.9104	11.3355	0.000386975	25.4543	8.87941	0.00212339	15.8956	-0.679296	1.60136	22.9871	6.41225	0.0117415	19.7119	3.13701	0.113675	21.6437	5.06877	0.0297953	20.3395	3.76465	0.0735747	19.9654	3.39052	0.0953568	23.6513	7.07636	0.00740973
B2	5% O2 IGF	1	0.05	+		152.3	2.05	2.23	16.3281	0.11021	15.1302	16.3286	14.4595	-1.86912	3.65309	16.8853	0.556647	0.67988	22.0478	5.7192	0.0189823	28.6437	12.315	0.000196246	27.8119	11.4833	0.000349297	15.5206	-0.808048	1.75084	24.8739	8.54533	0.0026767	20.2561	3.9275	0.065721	24.0266	7.698	0.00481583	20.2103	3.8817	0.067841	19.9222	3.59359	0.0828363	20.062	3.73343	0.075184
B3	5% O2 Mix	1	0.05		+	98.5	1.87	2.02	16.3711	0.1218	14.2967	16.7953	14.729	-2.06634	4.18822	15.7078	-1.08756	2.12514	21.9137	5.11834	0.0287889	26.6521	9.85674	0.00107851	25.2418	8.44646	0.00286657	15.4914	-1.30392	2.46899	22.6778	5.88252	0.0169506	19.4324	2.6371	0.160751	20.653	3.85765	0.0689816	21.2682	4.47292	0.0450315	21.5894	4.79409	0.0360442	22.9913	6.19601	0.01364
B4	5% O2 Mix + IGF	1	0.05	+	+	114	1.98	1.75	16.1672	0.09287	15.7686	16.2488	14.3946	-1.85421	3.61555	17.1863	0.937505	0.522135	22.1356	5.88681	0.0169003	29.121	12.8722	0.000133377	27.2814	11.0326	0.000477355	15.2405	-1.00829	2.01153	25.0705	8.82166	0.00221012	20.4518	4.20301	0.0542959	24.1866	7.93777	0.00407843	19.8672	3.61843	0.0814223	22.308	6.05924	0.0149964	21.6098	5.36104	0.0243314
C1	20% O2 Control	1	0.2			117	2.05	1.48	17.9339	0.10945	19.8352	15.4867	14.1048	-1.38194	2.60619	15.9005	0.413794	0.750647	20.3318	4.8451	0.034792	25.2725	9.78572	0.00113294	23.855	8.36822	0.00302631	15.7216	0.234843	0.849778	21.6634	6.1767	0.0138238	18.0391	2.55232	0.170481	20.5875	5.10072	0.0291428	21.3424	5.85562	0.0172696	20.4311	4.94435	0.0324791	22.2233	6.73659	0.00937744
C2	20% O2 IGF	1	0.2	+		151.6	2.04	2.18	26.7575	0.12511	19.0056	15.5792	13.9674	-1.61175	3.05623	16.4932	0.914063	0.530688	20.0813	4.50212	0.0441294	26.1949	10.6157	0.000637309	24.7541	9.17495	0.00173007	15.2192	-0.35994	1.28337	22.2307	6.6515	0.00994714	18.6967	3.11756	0.115218	22.2521	6.67291	0.00980063	20.2386	4.65944	0.0395702	21.0703	5.49115	0.022233	19.7576	4.17843	0.0552291
C3	20% O2 mix	1	0.2		+	70.1	2.02	2.04	16.5313	0.16701	14.642	15.777	14.4071	-1.36991	2.58454	15.8479	0.0709028	0.952042	20.346	4.569	0.0421301	25.0361	9.25909	0.00163206	24.5583	8.78136	0.00227273	15.3968	-0.380203	1.30153	21.9017	6.12475	0.0143307	18.4158	2.63879	0.160563	20.5888	4.81181	0.0356041	22.0542	6.27726	0.0128931	21.1112	5.33419	0.0247884	21.9262	6.14917	0.0140902
C4	20% O2 Mix + IGF	1	0.2	+	+	85.4	2.06	1.93	23.7418	0.15865	20.6363	15.105	14.5737	-0.531368	1.4453	16.8246	1.71955	0.303644	20.1432	5.03813	0.0304349	25.187	10.082	0.000922629	24.9743	9.86927	0.00106918	15.0129	-0.0921535	1.06596	22.3292	7.22418	0.00668814	18.9381	3.83306	0.0701671	21.8417	6.73663	0.00937718	21.8541	6.74909	0.00929657	22.666	7.56102	0.00529549	20.5687	5.46368	0.0226604
D1	2% O2 Control	2	0.02			68	2.08	1.79	9.30393	0.09213	13.5873	16.0247	14.2307	-1.79391	3.46754	16.7314	0.706765	0.612693	22.3522	6.32758	0.0124512	27.1986	11.174	0.00043281	24.6066	8.58197	0.00260957	15.6878	-0.33684	1.26299	23.7421	7.71744	0.00475138	19.643	3.6183	0.08143	21.1161	5.09143	0.0293309	21.1401	5.1154	0.0288476	20.1261	4.10144	0.0582563	22.5875	6.56287	0.0105774
D2	2% O2 IGF	2	0.02	+		40.5	2.09	1.91	11.2766	0.08879	9.85158	17.0557	15.1139	-1.94182	3.8419	17.9288	0.873142	0.545956	22.9789	5.92318	0.0164796	29.6969	12.6412	0.00015654	28.3522	11.2965	0.000397561	16.2818	-0.773848	1.70982	25.6813	8.62562	0.0025318	21.2324	4.17669	0.0552957	24.553	7.4973	0.00553462	19.8716	2.8159	0.142014	21.2412	4.18547	0.0549601	21.8165	4.76081	0.0368854
D3	2% O2 Mix	2	0.02		+	46.3	2.09	2.31	10.2101	0.1325	12.524	16.1469	14.4527	-1.69422	3.23601	16.2726	0.125702	0.916558	22.4198	6.27294	0.0129318	27.1946	11.0477	0.000472396	24.7758	8.62894	0.00252599	15.35	-0.79683	1.73728	23.9493	7.80243	0.00447954	19.8313	3.68439	0.0777837	20.9351	4.78821	0.0361915	20.2535	4.10659	0.0580489	21.7121	5.56525	0.02112	23.508	7.36116	0.00608235
D4	2% Mix + IGF	2	0.02	+	+	30.6	2.01	2.2	12.2633	0.07949	9.47168	16.7132	16.5926	-0.120598	1.08719	19.3007	2.58748	0.166376	23.9169	7.20371	0.00678371	31.0847	14.3715	4.71791e-05	29.7014	12.9882	0.000123076	17.2403	0.527039	0.693978	27.5289	10.8157	0.000554815	22.6711	5.95786	0.0160881	25.9772	9.26403	0.00162648	20.9411	4.22786	0.0533687	23.6653	6.95205	0.00807652	23.1632	6.45	0.0114381
E1	5% O2 Control	2	0.05			72.7	2.08	1.74	12.6069	0.08717	16.6437	15.6989	13.6361	-2.0628	4.17797	15.7839	0.0850039	0.942782	21.6265	5.92762	0.0164289	26.3263	10.6274	0.000632174	23.7287	8.02978	0.00382644	15.1884	-0.510514	1.42456	22.2357	6.53679	0.0107703	18.2108	2.51189	0.175326	20.0385	4.33955	0.0493929	19.5817	3.88279	0.0677895	19.0615	3.36262	0.097219	22.4897	6.79079	0.00903168
E2	5% O2 IGF	2	0.05	+		136.3	2.06	2.15	17.329	0.05939	20.0617	16.8024	14.324	-2.47842	5.57287	16.962	0.159526	0.895319	22.0945	5.29204	0.0255233	28.4605	11.658	0.000309446	26.4295	9.62705	0.00126465	15.5114	-1.29099	2.44696	24.9715	8.16903	0.00347437	20.3268	3.52435	0.0869092	23.801	6.9986	0.0078201	19.8699	3.06745	0.11929	20.3155	3.51308	0.0875907	20.2423	3.43989	0.0921491
E3	5% O2 Mix	2	0.05		+	91.1	2.06	2.11	12.4376	0.10584	13.3312	16.6842	15.2524	-1.43179	2.69782	16.7732	0.0890497	0.940142	22.3643	5.68014	0.0195033	27.1586	10.4744	0.00070288	26.3781	9.69391	0.00120738	16.084	-0.60015	1.51587	23.8527	7.16852	0.0069512	19.8909	3.20668	0.108316	21.3623	4.67816	0.03906	21.5201	4.83591	0.0350143	20.8065	4.12236	0.0574178	22.6079	5.92375	0.0164731
E4	5% O2 Mix + IGF	2	0.05	+	+	119.8	2.01	0.83	20.8794	0.08572	16.4544	15.9543	14.1945	-1.75975	3.38639	17.0019	1.04758	0.483777	21.6204	5.66608	0.0196942	27.5685	11.6142	0.000318998	25.8469	9.89259	0.00105204	15.2537	-0.700593	1.62517	23.9556	8.00133	0.00390266	19.4352	3.48095	0.089563	22.907	6.95269	0.00807295	19.5625	3.60822	0.0820007	21.5186	5.56429	0.0211341	21.1117	5.15739	0.0280202
F1	20% O2 Control	2	0.2			103.9	2.06	2.21	17.8678	0.0828	18.673	16.5323	15.5737	-0.958681	1.94353	16.7202	0.187864	0.877905	21.3657	4.83332	0.0350773	26.1781	9.64575	0.00124836	25.0934	8.5611	0.0026476	16.2545	-0.27785	1.21239	23.2335	6.70118	0.00961045	19.2002	2.66789	0.157356	21.7022	5.16988	0.0277785	22.8822	6.34984	0.0122605	20.8468	4.31448	0.0502588	22.4724	5.94005	0.016288
F2	20% O2 IGF	2	0.2	+		175.7	1.98	2	19.5915	0.09904	19.3246	16.5836	15.8717	-0.711927	1.63799	17.6127	1.02912	0.490009	21.7197	5.13611	0.0284365	27.887	11.3033	0.000395689	26.5492	9.96555	0.00100016	16.2548	-0.328866	1.25603	24.5695	7.98588	0.00394466	20.5091	3.92547	0.0658137	23.9249	7.34125	0.00616687	21.6215	5.03785	0.0304407	21.6934	5.1098	0.0289599	20.7692	4.1856	0.0549551
F3	20% O2 mix	2	0.2		+	84.7	1.86	1.69	15.3388	0.10444	21.3654	16.8389	16.1121	-0.726756	1.65491	17.2513	0.412369	0.751388	21.2292	4.39035	0.0476842	26.3565	9.51757	0.00136435	25.4606	8.62168	0.00253872	16.461	-0.377885	1.29944	22.4314	5.59247	0.0207252	19.7807	2.9418	0.130146	21.79	4.95106	0.0323282	23.5698	6.73093	0.00941433	23.1592	6.32032	0.012514	22.9759	6.13704	0.0142091
F4	20% O2 Mix + IGF	2	0.2	+	+	91.9	1.99	1.67	21.0505	0.09792	21.6009	16.44	16.4284	-0.0116253	1.00809	17.2513	0.811237	0.569893	21.1294	4.68936	0.0387581	26.6659	10.2259	0.000835024	26.1196	9.67959	0.00121942	16.2889	-0.151077	1.1104	23.1089	6.66887	0.00982813	20.5765	4.13651	0.0568574	22.9387	6.49868	0.0110587	23.5973	7.15732	0.0070054	23.3569	6.9169	0.00827572	20.8772	4.43722	0.0461597
G1	20% O2 Control	3	0.2			107.7	2.07	2.03	19.2365	0.13804	15.0397	16.2851	15.4671	-0.817989	1.76295	16.4615	0.176406	0.884905	20.7873	4.50224	0.0441255	26.0382	9.75308	0.00115886	24.3443	8.0592	0.00374919	16.0476	-0.237525	1.17897	22.0061	5.72106	0.0189578	19.0303	2.74521	0.149146	21.6874	5.40229	0.0236455	22.7061	6.42102	0.0116702	21.2769	4.9918	0.0314282	23.2356	6.95055	0.0080849
G2	20% O2 IGF	3	0.2	+		137.3	2.06	1.7	27.2088	0.13947	17.6418	16.6207	15.9623	-0.658387	1.57832	17.6379	1.01721	0.49407	20.9881	4.36747	0.0484463	27.3284	10.7077	0.000597956	25.7203	9.09965	0.00182277	16.236	-0.38467	1.30556	22.9459	6.3252	0.0124717	20.0215	3.40083	0.0946781	22.5411	5.92037	0.0165116	22.6752	6.05449	0.0150459	22.8637	6.24307	0.0132023	21.8739	5.25319	0.02622
G3	20% O2 mix	3	0.2		+	69.3	2.06	2.18	21.3863	0.14815	16.0321	16.3215	15.8773	-0.444254	1.36061	17.0109	0.689401	0.620111	20.8908	4.56927	0.0421222	25.8666	9.54507	0.00133859	25.6478	9.32626	0.00155781	16.3485	0.0269616	0.981485	22.3297	6.00818	0.0155367	19.3498	3.0283	0.122572	21.3964	5.07487	0.0296696	23.1551	6.8336	0.00876759	23.2121	6.89053	0.00842838	22.6813	6.3598	0.0121762
G4	20% O2 Mix + IGF	3	0.2	+	+	69.6	2.04	1.4	25.8735	0.14077	18.8312	16.3579	16.4141	0.0562115	0.961786	17.9115	1.55356	0.340668	20.8486	4.4907	0.0444799	26.417	10.0591	0.000937355	26.7579	10.4	0.000740119	16.0969	-0.26103	1.19833	22.7281	6.37019	0.0120888	20.3138	3.95588	0.0644409	22.8141	6.45619	0.0113892	22.9923	6.63441	0.0100657	23.7424	7.38446	0.00598489	20.861	4.50315	0.0440979
H1	5% O2 Control	3	0.05			70.2	1.98	1.42	13.9768	0.14298	10.2347	18.046	15.1352	-2.9108	7.52036	16.6558	-1.39016	2.62107	22.5127	4.46676	0.0452243	28.0528	10.0068	0.000971957	25.1121	7.06617	0.00746225	16.2111	-1.8349	3.56748	23.3799	5.33391	0.0247932	20.3308	2.28481	0.205212	21.8504	3.80441	0.0715744	21.6877	3.64175	0.0801171	20.9634	2.91747	0.132359	23.6435	5.59751	0.020653
H2	5% O2 IGF	3	0.05	+		58	1.93	1.13	17.8884	0.14504	10.269	17.6112	14.5845	-3.02668	8.14932	16.4233	-1.18784	2.27812	21.7826	4.17146	0.0554966	29.2435	11.6323	0.000315015	27.7409	10.1297	0.000892613	15.5179	-2.09332	4.26728	24.5397	6.9285	0.00820943	20.6101	2.99896	0.12509	24.7915	7.18033	0.00689452	21.779	4.16781	0.0556371	21.2037	3.59256	0.0828954	21.952	4.34083	0.0493491
H3	5% O2 Mix	3	0.05		+	60	2.07	1.81	23.243	0.14939	13.0936	16.8133	14.5374	-2.27585	4.84283	16.1385	-0.6748	1.59638	21.3681	4.55482	0.0425464	26.9277	10.1145	0.000902067	24.7986	7.98538	0.00394603	15.1477	-1.6656	3.17246	22.316	5.5027	0.0220558	19.1841	2.37084	0.193333	20.9165	4.10328	0.0581821	21.286	4.47271	0.045038	21.218	4.40472	0.0472115	22.8301	6.01688	0.0154433
H4	5% O2 Mix + IGF	3	0.05	+	+	98.8	1.77	0.54	18.8241	0.1523	13.202	17.6936	14.8204	-2.87319	7.32682	17.3133	-0.380252	1.30157	22.2182	4.52469	0.0434444	29.1248	11.4312	0.000362124	26.9995	9.30596	0.00157989	15.7715	-1.92206	3.78965	24.6295	6.9359	0.00816741	20.4763	2.78272	0.145317	24.2943	6.60077	0.0103032	21.7098	4.01626	0.0617995	23.2945	5.60095	0.0206037	22.0965	4.40296	0.047269
I1	2% O2 Control	3	0.02			33.6	2.1	3.08	10.1128	0.15844	9.36487	17.4718	14.603	-2.86889	7.30501	16.9404	-0.531458	1.44539	22.1839	4.71203	0.0381539	28.0817	10.6098	0.000639909	25.0018	7.52994	0.0054108	15.9048	-1.5671	2.96308	23.2759	5.80405	0.0178981	20.1411	2.66921	0.157212	21.4883	4.01648	0.0617903	21.7978	4.32594	0.049861	22.4332	4.96139	0.0320977	22.9019	5.43001	0.0231955
I2	2% O2 IGF	3	0.02	+		24	1.98	2.01	14.9364	0.16019	9.28845	17.7526	14.5444	-3.2082	9.24194	17.4851	-0.267561	1.20377	21.9598	4.20721	0.0541383	29.4544	11.7018	0.000300203	28.0297	10.277	0.000805943	15.8785	-1.87411	3.66575	24.1074	6.3548	0.0122184	20.8567	3.10404	0.116303	24.4604	6.70775	0.0095668	21.5769	3.82423	0.0705978	22.3146	4.56192	0.0423374	22.0555	4.30285	0.0506658
I3	2% O2 Mix	3	0.02		+	43.2	1.98	0.77	15.1386	0.170164	10.3162	16.5876	14.2104	-2.37721	5.19529	16.9437	0.35616	0.781241	21.9587	5.37112	0.0241619	27.8394	11.2518	0.000410071	24.9041	8.31653	0.00313672	15.7459	-0.841657	1.79211	23.0878	6.50028	0.0110464	19.8547	3.26716	0.103869	21.1385	4.55091	0.0426619	21.2562	4.66863	0.039319	24.476	7.88843	0.00422032	22.3049	5.71738	0.0190063
I4	2% Mix + IGF	3	0.02	+	+	29.8	2.07	2.4	14.2409	0.136301	11.2741	17.2972	14.3449	-2.95237	7.74017	17.6287	0.331483	0.794719	22.377	5.07976	0.0295692	29.1719	11.8746	0.000266307	27.7032	10.4059	0.000737052	15.8208	-1.47647	2.78268	24.3412	7.04394	0.00757814	20.7261	3.42886	0.0928558	24.2596	6.96233	0.00801919	21.4979	4.2007	0.0543829	23.4397	6.14246	0.0141558	21.7566	4.45937	0.0454566
J1	20% O2 Control	4	0.2			104.2	1.76	0.58	19.359	0.13244	15.5948	17.6517	16.1075	-1.54414	2.9163	17.0111	-0.640583	1.55896	21.3571	3.7054	0.0766588	27.1083	9.45665	0.00142319	24.8077	7.15601	0.00701173	16.3908	-1.26084	2.39636	22.6282	4.97649	0.0317635	19.7059	2.05419	0.240784	22.3046	4.65291	0.0397498	23.5002	5.84852	0.0173548	20.8946	3.24288	0.105632	24.675	7.02329	0.0076874
J2	20% O2 IGF	4	0.2	+		141.8	2.08	2.36	29.586	0.14184	19.1783	15.3277	14.6911	-0.636647	1.55471	16.5054	1.1777	0.442057	20.1305	4.80272	0.0358292	26.6869	11.3591	0.000380684	24.734	9.40629	0.00147375	15.6188	0.291052	0.817306	22.3252	6.99745	0.00782634	19.2902	3.96245	0.064148	22.301	6.97325	0.00795871	21.5284	6.20063	0.0135965	20.8585	5.53078	0.0216306	21.6926	6.36487	0.0121334
J3	20% O2 mix	4	0.2		+	83.8	2.01	0.67	21.7878	0.14684	13.8679	16.9083	16.4789	-0.429439	1.34671	17.2172	0.308877	0.80727	21.3724	4.46411	0.0453073	27.3763	10.468	0.000706014	24.8387	7.93039	0.00409934	16.4863	-0.42204	1.33982	22.8253	5.917	0.0165503	19.9245	3.0162	0.123604	22.3069	5.39856	0.0237067	23.9873	7.07902	0.0073961	21.2923	4.38396	0.0478957	24.2109	7.30263	0.00633418
J4	20% O2 Mix + IGF	4	0.2	+	+	108.7	2.08	2.31	27.2	0.14087	20.481	15.8928	15.3403	-0.55242	1.46654	16.7854	0.892615	0.538637	19.8604	3.96759	0.06392	25.573	9.68027	0.00121885	24.6661	8.77331	0.00228544	14.5156	-1.37711	2.59748	21.8646	5.97179	0.0159335	19.3885	3.49578	0.088647	21.2427	5.3499	0.02452	22.389	6.49624	0.0110774	21.9711	6.07835	0.0147991	20.9619	5.06915	0.0297876
K1	5% O2 Control	4	0.05			50.2	2.08	2.6	15.2197	0.13575	11.4059	16.9713	14.4611	-2.51021	5.69703	16.3663	-0.605051	1.52103	21.8618	4.89046	0.0337152	27.7634	10.792	0.000563997	23.6104	6.63907	0.0100332	15.7223	-1.24905	2.37684	22.8445	5.87313	0.0170612	19.8309	2.85955	0.137781	21.3	4.32872	0.0497652	21.8541	4.88274	0.0338959	21.3159	4.34457	0.0492213	23.2171	6.24577	0.0131776
K2	5% O2 IGF	4	0.05	+		57	1.95	1.21	17.1324	0.13405	14.6632	17.5456	14.2873	-3.25826	9.56831	16.1073	-1.43825	2.70992	21.3669	3.82136	0.0707386	28.314	10.7684	0.000573298	27.5492	10.0036	0.000974105	14.9192	-2.62635	6.17462	24.1283	6.58271	0.0104329	20.5192	2.97362	0.127307	24.7128	7.16721	0.00695755	20.766	3.22044	0.107288	20.6867	3.1411	0.113353	21.6588	4.11326	0.057781
K3	5% O2 Mix	4	0.05		+	45.4	2.05	2.32	19.3322	0.14884	12.1063	17.1501	13.9079	-3.24213	9.4619	16.0198	-1.13028	2.18901	21.0312	3.88112	0.0678684	26.3249	9.17481	0.00173024	24.2531	7.10301	0.00727415	14.983	-2.16709	4.49115	22.2068	5.05674	0.0300448	18.8706	1.72054	0.303435	20.2919	3.14179	0.113299	20.6819	3.53184	0.0864587	22.1474	4.99727	0.0313091	22.4463	5.29619	0.02545
K4	5% O2 Mix + IGF	4	0.05	+	+	57.4	2.09	1.87	22.7131	0.13		16.5718	14.0982	-2.47358	5.55421	16.5683	-0.00356038	1.00247	21.3314	4.75956	0.0369173	28.7355	12.1637	0.000217954	26.0853	9.51346	0.00136824	15.7816	-0.790188	1.7293	24.1953	7.62344	0.00507125	19.4891	2.91729	0.132376	23.655	7.08322	0.00737462	20.7766	4.20482	0.054228	22.6704	6.09856	0.0145932	21.3827	4.81092	0.0356262
L1	2% O2 Control	4	0.02			40.6	1.93	1.55	10.6218	0.15768	8.4787	16.5977	14.4143	-2.18342	4.54229	16.5641	-0.0335808	1.02355	21.6475	5.04981	0.0301895	27.6298	11.0321	0.000477537	26.3153	9.71766	0.00118766	15.5842	-1.01345	2.01874	22.9243	6.32664	0.0124592	19.6341	3.03646	0.12188	21.0233	4.42565	0.0465315	21.1831	4.58545	0.0416524	22.3101	5.71245	0.0190713	22.6524	6.05477	0.015043
L2	2% O2 IGF	4	0.02	+		17.7	2.02	1.03	13.2715	0.14817	8.9549	17.6722	15.0071	-2.66513	6.34286	17.8863	0.214113	0.862076	22.4576	4.78537	0.0362626	29.9482	12.2759	0.000201641	31.254	13.5818	8.15592e-05	16.4116	-1.26066	2.39605	25.3337	7.6615	0.00493924	21.7105	4.03825	0.0608649	24.9293	7.25709	0.00653732	22.0427	4.37046	0.0483458	22.8703	5.19807	0.0272411	22.4563	4.7841	0.0362947
L3	2% O2 Mix	4	0.02		+	35	2	1.34	11.2978	0.15234	10.8175	16.6751	14.486	-2.18908	4.56015	17.205	0.529953	0.692577	22.352	5.6769	0.0195471	27.8121	11.1371	0.000444031	27.8802	11.2052	0.000423557	15.8161	-0.858935	1.8137	23.8115	7.13647	0.00710735	20.3964	3.72135	0.0758162	21.6496	4.97456	0.031806	21.2479	4.57288	0.0420171	23.1683	6.49324	0.0111004	22.9951	6.32001	0.0125166
L4	2% Mix + IGF	4	0.02	+	+	26	2.04	1.88	13.9208	0.15518	11.2741	15.7064	13.518	-2.18848	4.55824	17.1618	1.45539	0.364657	21.5825	5.87605	0.0170268	28.437	12.7306	0.000147133	29.3052	13.5988	8.06025e-05	15.4514	-0.255042	1.19337	24.2669	8.56043	0.00264883	20.3602	4.65374	0.0397268	23.7171	8.01072	0.00387734	20.8904	5.18397	0.0275087	22.2637	6.55727	0.0106185	20.7817	5.07526	0.0296615
M1	20% O2 Control	5	0.2			94.1	2.01	1.64	19.2189	0.07591	16.3525	17.75	15.7382	-2.01183	4.03294	18.0934	0.343345	0.788212	21.2462	3.49617	0.0886235	26.856	9.10602	0.00181475	28.0887	10.3386	0.000772251	16.4086	-1.34143	2.53403	22.8659	5.11586	0.0288385	19.5789	1.82887	0.281484	22.1538	4.40377	0.0472427	23.2141	5.46404	0.0226548	22.4222	4.67217	0.0392226	23.2333	5.48326	0.022355
M2	20% O2 IGF	5	0.2	+		158.5	2.02	1.94	31.0202	0.085109	27.5842	17.5321	15.2192	-2.31288	4.96873	18.0286	0.496569	0.70879	20.5932	3.06113	0.119814	27.2069	9.67488	0.00122341	27.5202	9.98816	0.00098461	15.7347	-1.79737	3.47586	22.4112	4.87918	0.0339799	19.4076	1.87555	0.272523	23.0831	5.55104	0.021329	21.8996	4.36755	0.0484437	23.0275	5.4954	0.0221676	21.1342	3.60211	0.0823487
M3	20% O2 mix	5	0.2		+	67.3	1.99	1.2	24.4786	0.100818	14.5588	18	15.7972	-2.20281	4.60374	18.1732	0.173247	0.886844	21.2571	3.25715	0.104592	25.5201	7.52015	0.00544765	28.3431	10.3431	0.00076985	16.1545	-1.84545	3.59365	23.0788	5.07878	0.0295892	19.5853	1.5853	0.333255	21.4664	3.46646	0.0904671	23.5551	5.55511	0.021269	24.3934	6.39344	0.0118955	23.2575	5.25754	0.0261411
M4	20% O2 Mix + IGF	5	0.2	+	+	70.7	2	2.02	24.4681	0.09681	17.1845	18.209	16.2837	-1.92529	3.79813	18.7802	0.571266	0.673026	20.9776	2.7686	0.146747	25.4273	7.21837	0.00671513	28.8175	10.6085	0.000640485	16.1113	-2.09771	4.28028	23.4811	5.2721	0.0258785	20.5573	2.34833	0.196373	22.9188	4.70986	0.0382112	22.7053	4.4963	0.0443077	26.0498	7.84086	0.0043618	22.2601	4.05115	0.0603228
N1	5% O2 Control	5	0.05			69	1.98	1.65	11.2051	0.082724	13.1781	18.1781	14.9369	-3.24116	9.45554	16.8824	-1.29567	2.45491	21.6376	3.45949	0.0909054	27.4638	9.28575	0.00160218	27.9551	9.77704	0.00113977	15.8352	-2.34289	5.07316	22.9772	4.79911	0.0359191	19.3604	1.18234	0.440637	22.0517	3.87359	0.0682231	21.9859	3.80789	0.0714022	19.426	1.2479	0.421062	22.0368	3.85869	0.0689314
N2	5% O2 IGF	5	0.05	+		125.6	2	2.19	24.5715	0.07	20.6602	17.9076	14.1456	-3.76201	13.5668	17.3418	-0.565835	1.48024	21.5616	3.65396	0.0794419	27.7532	9.84558	0.00108689	27.9784	10.0708	0.000929805	15.2107	-2.69692	6.48418	23.5515	5.64385	0.0200002	19.4704	1.56272	0.338512	23.0582	5.15056	0.0281532	19.7148	1.80714	0.285756	21.0496	3.14195	0.113287	21.1511	3.24345	0.10559
N3	5% O2 Mix	5	0.05		+	65.2	2.01	1.84	18.7582	0.08	14.482	16.6289	14.2084	-2.42044	5.35335	16.8265	0.197636	0.871978	21.5011	4.87218	0.0341452	26.1363	9.5074	0.001374	27.2726	10.6437	0.000625056	15.5086	-1.12029	2.1739	22.6149	5.98601	0.0157772	19.0882	2.45928	0.181837	20.67	4.04107	0.0607457	21.2462	4.61731	0.0407429	21.2991	4.67025	0.0392749	22.3905	5.76163	0.0184321
N4	5% O2 Mix + IGF	5	0.05	+	+	69.6	1.98	1.06	18.1318	0.08	14.2441	17.9812	13.9504	-4.03077	16.3449	17.0474	-0.933816	1.91032	21.426	3.4448	0.091836	26.5301	8.54889	0.00267009	28.3298	10.3486	0.000766947	15.181	-2.80025	6.96561	23.3857	5.4045	0.0236093	19.747	1.7658	0.294064	21.7427	3.76147	0.073737	20.4068	2.42554	0.18614	22.2387	4.25751	0.0522831	21.1107	3.12946	0.114271
O1	2% O2 Control	5	0.02			26.2	2.01	2.76	13.8363	0.09043	10.0501	18.2159	14.8372	-3.37866	10.4011	17.8207	-0.395177	1.3151	22.768	4.55213	0.0426257	29.0232	10.8073	0.000558062	28.033	9.81709	0.00110856	16.4623	-1.75355	3.37188	24.2019	5.98598	0.0157776	20.2299	2.01399	0.247588	22.4187	4.20286	0.0543017	21.5897	3.37381	0.0964674	21.1625	2.94659	0.129714	22.9597	4.74383	0.037322
O2	2% O2 IGF	5	0.02	+		64.3	2.01	2.76	10.3765	0.09	9.03134	17.581	14.6668	-2.9142	7.53807	18.5121	0.931086	0.524463	22.7357	5.15472	0.0280722	29.4705	11.8895	0.000263571	29.926	12.345	0.000192216	15.9759	-1.6051	3.04217	25.0508	7.46978	0.00564121	20.6264	3.04533	0.121133	24.0752	6.49419	0.0110932	20.9821	3.40109	0.0946605	23.5585	5.97746	0.015871	22.6155	5.03452	0.0305111
O3	2% O2 Mix	5	0.02		+	45.1	1.99	2.4	12.148	0.08	10.5396	17.5433	14.3242	-3.21916	9.31242	17.1641	-0.379192	1.30061	21.9134	4.37002	0.0483607	27.1211	9.5778	0.00130856	27.3902	9.84684	0.00108594	15.4215	-2.12181	4.35238	23.1951	5.65179	0.0198903	19.4575	1.91416	0.265327	20.6948	3.15151	0.112538	20.1491	2.60581	0.164276	22.4001	4.85681	0.0345107	23.3801	5.8368	0.0174964
O4	2% Mix + IGF	5	0.02	+	+	31.5	2.05	2.66	10.5136	0.07	11.2236	16.774	12.7464	-4.02759	16.3089	16.7888	0.0147521	0.989827	21.0521	4.27809	0.0515427	27.2804	10.5064	0.000687489	28.2769	11.5028	0.000344588	14.7319	-2.04214	4.11856	23.0026	6.22853	0.013336	19.1511	2.37712	0.192494	22.9809	6.20683	0.0135381	20.2534	3.47936	0.0896621	21.8092	5.03519	0.030497	21.0925	4.31844	0.0501209
P1	20% O2 Control	6	0.2			95	2.01	1.73	17.7231	0.09	18.8536	16.9527	14.5834	-2.36927	5.16681	16.7184	-0.234254	1.1763	19.9762	3.02356	0.122976	25.4731	8.52039	0.00272337	26.18	9.22728	0.00166845	15.5897	-1.36298	2.57216	21.7268	4.7741	0.036547	18.4436	1.49091	0.355787	21.0413	4.0886	0.0587773	21.7834	4.83072	0.0351405	21.5612	4.60855	0.040991	22.5102	5.55749	0.0212339
P2	20% O2 IGF	6	0.2	+		132.7	1.82	0.93	33.4637	0.11	23.1623	17.1919	15.8886	-1.3033	2.46793	18.0028	0.81089	0.57003	20.5946	3.40267	0.0945573	27.615	10.4231	0.000728343	28.4983	11.3064	0.000394855	16.0072	-1.18468	2.27313	23.3283	6.13638	0.0142156	20.3088	3.11686	0.115274	23.9937	6.80176	0.00896324	22.606	5.41406	0.0234533	24.4466	7.25471	0.00654808	22.7297	5.53783	0.0215252
P3	20% O2 mix	6	0.2		+	56	1.95	0.57	17.9791	0.08	15.9217	17.8855	15.7599	-2.12559	4.36382	17.9215	0.0360317	0.975334	21.2482	3.36271	0.0972127	27.0686	9.18308	0.00172035	27.8597	9.97425	0.000994147	16.1921	-1.69343	3.23424	23.1419	5.25636	0.0261624	19.7648	1.87935	0.271805	22.0276	4.14211	0.0566372	23.2646	5.3791	0.0240287	23.9724	6.08687	0.0147119	23.6765	5.79102	0.0180605
P4	20% O2 Mix + IGF	6	0.2	+	+	64.8	2.02	2.17	23.6789	0.1	19.0443	17.7013	16.072	-1.62932	3.09366	18.38	0.678672	0.62474	21.0275	3.32614	0.0997086	27.9943	10.2929	0.00079712	28.3195	10.6182	0.000636219	16.1932	-1.50816	2.84446	23.2405	5.5392	0.0215047	20.6147	2.91331	0.132741	24.2505	6.54914	0.0106785	22.5347	4.83331	0.0350775	25.7069	8.00553	0.00389129	22.7778	5.07645	0.0296371
Q1	5% O2 Control	6	0.05			121.2	1.85	0.84	17.5913	0.09	14.3894	17.7642	14.285	-3.47918	11.1516	16.7663	-0.997885	1.99707	21.7124	3.94819	0.0647853	26.9978	9.23363	0.00166111	27.0087	9.24449	0.00164866	15.7778	-1.9864	3.96246	22.8831	5.11886	0.0287786	19.3087	1.54453	0.342807	21.1555	3.39128	0.0953063	20.3798	2.61556	0.163169	19.2678	1.50361	0.35267	21.7828	4.01862	0.0616987
Q2	5% O2 IGF	6	0.05	+		106.9	2.01	1.71	19.4011	0.08	18.1995	15.8446	13.7487	-2.09587	4.27483	16.7294	0.88484	0.541548	21.3147	5.47009	0.0225599	27.5435	11.6989	0.000300799	27.9161	12.0715	0.000232341	15.0003	-0.844314	1.79541	24.0416	8.19697	0.00340773	19.3227	3.47811	0.0897396	23.0195	7.17491	0.0069205	19.4118	3.56716	0.0843681	22.1906	6.34595	0.0122935	20.1823	4.3377	0.0494562
Q3	5% O2 Mix	6	0.05		+	44.5	2	1.76	18.1043	0.09	18.3166	17.2671	14.3697	-2.89733	7.45047	16.8463	-0.420785	1.33866	21.5368	4.26975	0.0518416	26.3814	9.11435	0.00180429	25.5944	8.32737	0.00311323	15.5897	-1.67736	3.19842	22.8509	5.5838	0.0208502	19.3776	2.11055	0.231559	20.9234	3.6563	0.0793129	20.9446	3.67754	0.0781539		-17.2671	157727	23.0568	5.78968	0.0180773
Q4	5% O2 Mix + IGF	6	0.05	+	+	61.3	2	1.73	19.8898	0.08	16.2528	17.399	14.1467	-3.25224	9.52847	17.0871	-0.311916	1.24136	21.4635	4.06453	0.059766	26.9891	9.59009	0.00129746	26.5542	9.15525	0.00175386	15.4274	-1.97161	3.92205	23.7331	6.33416	0.0123945	19.8813	2.48236	0.178952	22.5362	5.13725	0.0284141	20.7024	3.30338	0.101294	22.5419	5.1429	0.0283029	21.484	4.08505	0.058922
R1	2% O2 Control	6	0.02			53.7	1.94	0.67	11.4093	0.07	11.1188	18.2867	14.8076	-3.47912	11.1512	17.7395	-0.547176	1.46122	22.5825	4.29575	0.0509156	27.9064	9.61965	0.00127115	25.601	7.3143	0.00628313	16.0127	-2.27397	4.83654	23.4239	5.13722	0.0284148	20.009	1.72229	0.303068	21.1749	2.88817	0.135074	20.5652	2.27847	0.206116	21.9798	3.69312	0.0773146	23.7303	5.4436	0.022978
R2	2% O2 IGF	6	0.02	+		47.4	1.85	0.85	9.7751	0.07	11.1891	16.7876	14.8948	-1.89282	3.7136	18.5556	1.76806	0.293604	22.5956	5.80803	0.0178488	29.6925	12.9049	0.000130385	27.548	10.7604	0.000576511	16.1526	-0.634944	1.55288	24.9955	8.20792	0.00338196	20.8188	4.03119	0.0611633	24.2462	7.45861	0.00568506	20.5044	3.71685	0.0760532	21.2269	4.43928	0.046094	21.1226	4.33498	0.0495497
R3	2% O2 Mix	6	0.02		+	46.7	1.73	1.33	13.1283	0.09	14.1664	17.2883	15.2374	-2.05093	4.14372	17.7731	0.484816	0.714588	22.47	5.18165	0.0275529	27.9092	10.6208	0.000635052	26.0884	8.80008	0.00224342	16.1388	-1.14952	2.2184	23.8586	6.57028	0.0105232	20.1878	2.89952	0.134017	21.38	4.09167	0.0586524	20.9907	3.70235	0.0768213	23.7512	6.46284	0.0113368	24.2609	6.97255	0.00796256
R4	2% Mix + IGF	6	0.02	+	+	24.8	1.77	0.78	15.4168	0.07	12.1972	16.4902	14.6755	-1.81472	3.51792	18.1942	1.70404	0.306924	22.2663	5.7761	0.0182482	29.1864	12.6962	0.000150681	28.2024	11.7122	0.000298036	16.1793	-0.310944	1.24052	24.9419	8.45169	0.0028562	20.8863	4.3961	0.0474942	24.6085	8.11829	0.00359875	20.9791	4.48889	0.0445357	23.5492	7.05901	0.00749941	22.5002	6.01001	0.015517

## Sheet: Experiments IGF1, rapamycin
	kp#3
		Conc. RNA	260/280	260/230	18S	Myoglobin			Relative to control
Sample	Treatment	ng/ul			Ct	Ct	ΔCt	2^-ΔCt	ΔΔCt	2^-ΔΔCt
3R1	Control	93.3	2.1	2.29	16.283	19.7714	3.48844	0.0890996	0	1
3R4	IGF1	165.3	2.08	2.23	15.9742	20.072	4.09775	0.0584056	0.609311	0.65551
3R2	Rapa2	80.2	2.09	2.28	16.4938	19.7621	3.26831	0.103786	-0.220125	1.16483
3R5	Rapa2+IGF1	132.5	2.1	2.12	16.2018	19.2552	3.05334	0.120463	-0.435101	1.35201
	kp#5
5R1	Control	135.4	2.05	2.18	16.0333	18.0738	2.04057	0.243068	0	1
5R4	IGF1	233.3	2.07	2.14	16.7375	19.297	2.55954	0.16963	0.518967	0.697872
5R2	Rapa2	118.7	2.04	1.51	16.1229	17.8962	1.77337	0.292524	-0.267195	1.20347
5R5	Rapa2+IGF1	193.9	2.06	2.14	16.2435	18.5891	2.34551	0.196758	0.304939	0.809476
	kp#6
6R1	Control	178	2.06	2.11	15.8008	18.2584	2.45763	0.182046	0	1
6R4	IGF1	274.7	2.07	2.05	15.9092	18.9769	3.06765	0.119274	0.610026	0.655185
6R2	Rapa2	160.8	2.05	1.76	15.9445	18.0939	2.14938	0.22541	-0.30825	1.23821
6R5	Rapa2+IGF1	246.4	2.05	2.08	16.0559	18.0013	1.94543	0.259637	-0.512192	1.42622
	kp#7
7R1	Control	187	1.97	1.95	16.0361	17.7581	1.72199	0.303131	0	1
7R4	IGF1	268.5	2.05	1.97	16.6833	18.8713	2.18803	0.219451	0.466038	0.72395
7R2	Rapa2	147.5	2.05	2.11	15.5645	17.1943	1.6298	0.323134	-0.0921917	1.06599
7R5	Rapa2+IGF1	274.7	2.06	1.99	15.8662	18.065	2.19878	0.217821	0.476795	0.718572

## Sheet: Experiments 3D live imaging
Control				IGF
Height (um)	Width (um)	Mean Height	Mean Width	Height (um)	Width (um)	Mean Height	Mean Width
12.82	14.84			18.88	15.87
15.61	16.28			17.12	14.47
10.69	16.77			17.19	15.94
14.03	18.41			21.82	19.4
17.38	17.19	14.106	16.698	16.02	16.31	18.206	16.398
7.96	8.93			16.74	12.5
6.83	8.7			16.59	12.66
8.7	10.52			19.98	21.52
7.85	7.51			15.97	13.04
7.34	6.88	7.736	8.508	21.76	20.22	18.208	15.988
7.41	8.3			14.35	12.85
5.07	5.93			12.38	11.25
6.12	8.1			12.2	10.98
7.05	10.67			14.26	10.78
9.42	12.71	7.014	9.142	12.75	10.69	13.188	11.31
14.27	13.62			17.1	17.01
11.77	12.51			16.84	17.1
7.6	8.99			16.42	20.08
14.27	14.29			14.21	16
11.96	14.08	11.974	12.698	13.44	14.54	15.602	16.946
18.49	24.21			15.41	21.41
17.67	22.78			15.76	21.53
14.5	14.1			19.65	28.82
16.75	16.14			16.23	22.12
16.24	16.55	16.73	18.756	13.18	12.71	16.046	21.318
13.73	12.01			17.82	18.83
11.05	9.12			15.69	16.81
6.65	6.11			11.32	10.31
15.44	13.08			17.71	18.04
13.51	12.01	12.076	10.466	14.46	17.37	15.4	16.272
22.35	23.04			13.12	16.11
19.69	22.35			12.6	15.58
14.48	20.09			13.34	10.88
20.6	21.62			13.56	18.46
20.61	25.13	19.546	22.446	12.49	13.77	13.022	14.96
9.41	8.48			20.86	19.64
7.65	7.28			22.77	23.12
9.59	7.65			26.42	29.55
10.23	9.77			21.21	19.29
12.91	14.66	9.958	9.568	16.51	21.03	21.554	22.526
13.01	13.55			18.15	18.26
13.23	12.7			18.6	18.49
10.35	9.82			15.91	14.68
12.59	11.95			17.59	18.38
10.78	11.42	11.992	11.888	18.6	20.73	17.77	18.108
9.45	10.47			10.81	9.01
10.87	14.53			14.42	14.26
10.06	13.52			11.87	14.11
9.46	13.62			12.76	11.26
10.26	10.87	10.02	12.602	10.96	11.41	12.164	12.01
14.44	13.73			13.82	10.36
19.55	17.97			9.91	9.01
17.5	16.4			9.31	7.06
14.98	12.45			11.56	10.06
10.72	10.56	15.438	14.222	10.96	10.66	11.112	9.43
13.31	13.72			10.35	8.32
12.4	11.18			8	7.79
8.13	8.13			10.46	11.1
9.25	9.15			9.82	8.64
7.83	8.44	10.184	10.124	9.71	9.07	9.668	8.984
12.95	16.61			14.79	21.85
15.18	15.18			16.25	18.49
10.18	8.93			17.49	14.68
18.31	19.47			16.47	14.57
18.31	17.33	14.986	15.504	18.04	14.34	16.608	16.786
9.5	8.75			20.1	17.22
8.54	7.47			18.66	15.32
7.41	5.89			16.92	15.24
10.02	10.02			16.25	14.52
10.02	10.92	9.098	8.61	14.3	11.27	17.246	14.714
12.71	11.76			16.23	12.89
11.18	10.82			14.11	10.62
7.07	4.87			15.02	12.66
6.21	4.62			16.46	11.53
6.79	5.99	8.792	7.612	16.99	13.5	15.762	12.24
10.26	6.42			18.47	15.59
9.51	6.79			11.79	11.27
8.77	5.68			12.45	8.65
7.91	6.92			9.9	6.75
8.89	7.78	9.068	6.718	15.13	10.81	13.548	10.614
6.85	6.06			13.42	10.23
7.7	4.75			14.26	11.74
9.73	7.75			15.1	13.33
8.88	7.13			13.17	10.32
10.41	8.09	8.714	6.756	13.75	13.84	13.94	11.892
7.94	8.61			9.48	8.87
8.42	13.36			13.87	15.63
17.03	15.78			16.15	10.89
7.65	8.03			11.15	8.87
8.42	7.94	9.892	10.744	11.59	10.01	12.448	10.854
8.45	4.84			15.73	15.3
7.54	7.88			16.87	17.87
9.01	6.76			14.87	14.73
10.48	9.8			15.3	16.16
10.7	10.02	9.236	7.86	15.16	14.16	15.586	15.644
